# Supplementary material for: Size distributions and temporal variations of biological aerosol particles in the Amazon rainforest characterized by microscopy and real-time UV-APS fluorescence techniques during AMAZE-08
Source: Copernicus journal article supplement (doi:10.5194/acp-12-11997-2012), 2012-12-18
Supplement: Supplementary file 1 [file acp-12-11997-2012-supplement.pdf]

1 **Supplemental Information for:**

2 **Size distribution and temporal variation of biological aerosol particles in the**  
3 **Amazon rainforest characterized by microscopy and real-time UV-APS**  
4 **fluorescence techniques during AMAZE-08**

5  
6 J. A. Huffman<sup>1,2\*</sup>, B. Sinha<sup>3,4</sup>, R.M. Garland<sup>2%</sup>, A. Snee-Pollmann<sup>3#</sup>, S.S. Gunthe<sup>2&</sup>, P. Artaxo<sup>5</sup>,  
7 S.T. Martin<sup>6</sup>, M.O. Andreae<sup>2</sup>, and U. Pöschl<sup>2</sup>

8  
9 <sup>1</sup>*University of Denver, Department of Chemistry and Biochemistry, Denver, CO, USA*

10 <sup>2</sup>*Max Planck Institute for Chemistry, Biogeochemistry Department, Mainz, Germany*

11 <sup>3</sup>*Max Planck Institute for Chemistry, Particle Chemistry Department, Mainz, Germany*

12 <sup>4</sup>*IISER Mohali, Department of Earth Sciences, S. A. S. Nagar, Manauli PO, India*

13 <sup>5</sup>*Instituto de Fisica, Universidade de Sao Paulo, Sao Paulo, Brazil*

14 <sup>6</sup>*Harvard University, School of Engineering and Applied Sciences & Department of Earth and Planetary Sciences,*  
15 *Cambridge, MA, USA*

16 <sup>%</sup>*Now at Council for Scientific and Industrial Research (CSIR), Natural Resources and the Environment, Pretoria,*  
17 *South Africa*

18 <sup>#</sup>*Now at Roche Diagnostics GmbH, Pharma Research and Early Development, Penzberg, Germany*

19 <sup>&</sup>*Now at Indian Institute for Technology Madras, Department of Civil Engineering & EWRE Division, Chennai-36,*  
20 *India*

21  
22 *\*Corresponding author: alex.huffman@du.edu, +1 (303) 871-4404*  
23

24  
25  
26 **S1.1 Filter period definition**

27

| 28 | <u>Sample #</u> | <u>Focus Period</u> | <u>Date/Time Range (LT)</u> |
|----|-----------------|---------------------|-----------------------------|
| 29 | M30             | High Dust           | 29 Feb 13:58 – 1 Mar 13:50  |
| 30 | M02             | High Dust           | 1 Mar 13:53 – 2 Mar 17:15   |
| 31 | M07             | High Dust           | 7 Mar 16:05 – 8 Mar 16:00   |
| 32 | M04             | Low Dust            | 3 Mar 17:17 – 5 Mar 10:05   |
| 33 | M08             | Low Dust            | 8 Mar 16:15 – 9 Mar 15:53   |
| 34 | M12             | Low Dust            | 12 Mar 14:38 – 14 Mar 14:30 |

35

36 Filter M02 was nominally within the High Dust focus period, but was not included here, because  
37 the temporal overlap between filter period and available UV-APS data was poor. Times are  
38 listed as local time (LT).

39 **Plots:**

40 **Figure S1.** Comparison of particle size distributions for two individual samples (**A**: M04 and **B**: M08) from three  
41 techniques. Each panel: **(top)** lactophenol cotton blue fungal stain, **(middle)** counts from SEM analysis, **(bottom)**  
42 UV-APS. Colored areas are stacked plots. Middle panel: regions of solid color indicate uncoated particles, diagonal  
43 bars indicate particles coated with organic material.

44

45 **Figure S2.** Diurnal cycles of FBAP and total particle concentrations for measurement campaign, contrasted to Fig. 8  
46 showing data only from low dust period. Number and mass integrated 1-20  $\mu\text{m}$ . **(A)** total number, **(B)** FBAP  
47 number, **(C)** total mass, **(D)** FBAP mass. Time of day shown as LT. Black line is the same in panels **(A)** and **(B)**  
48 and **(C)** and **(D)**, showing relative number and mass contribution, respectively, from fluorescent biological particles.  
49 Mass is unit-normalized.

50

51 **Figure S3.** Diurnal patterns of three meteorological variables (downward solar flux, air temperature and relative  
52 humidity) compared to integrated number concentration of coarse FBAP ( $N_{F,c}$ ). Axes of temperature and solar flux  
53 are reversed to show overlap of all parameters. Times are shown as LT.

54

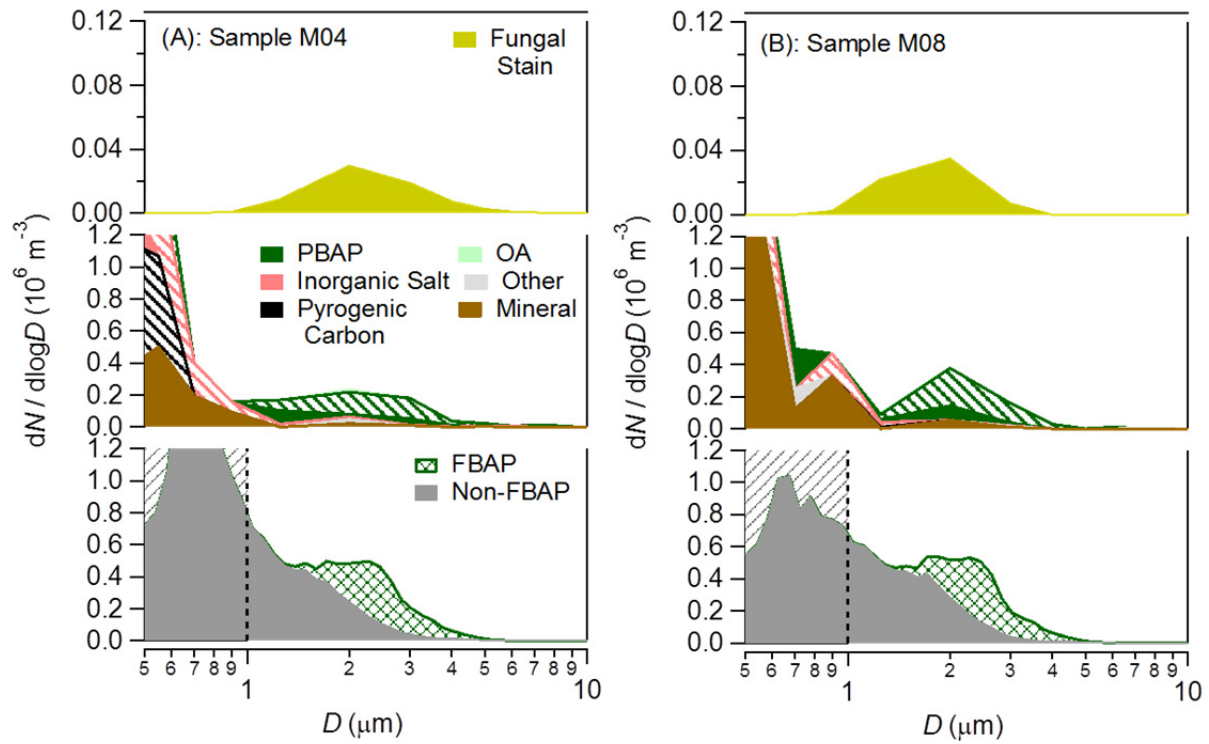

55

56 **Figure S1.**

57

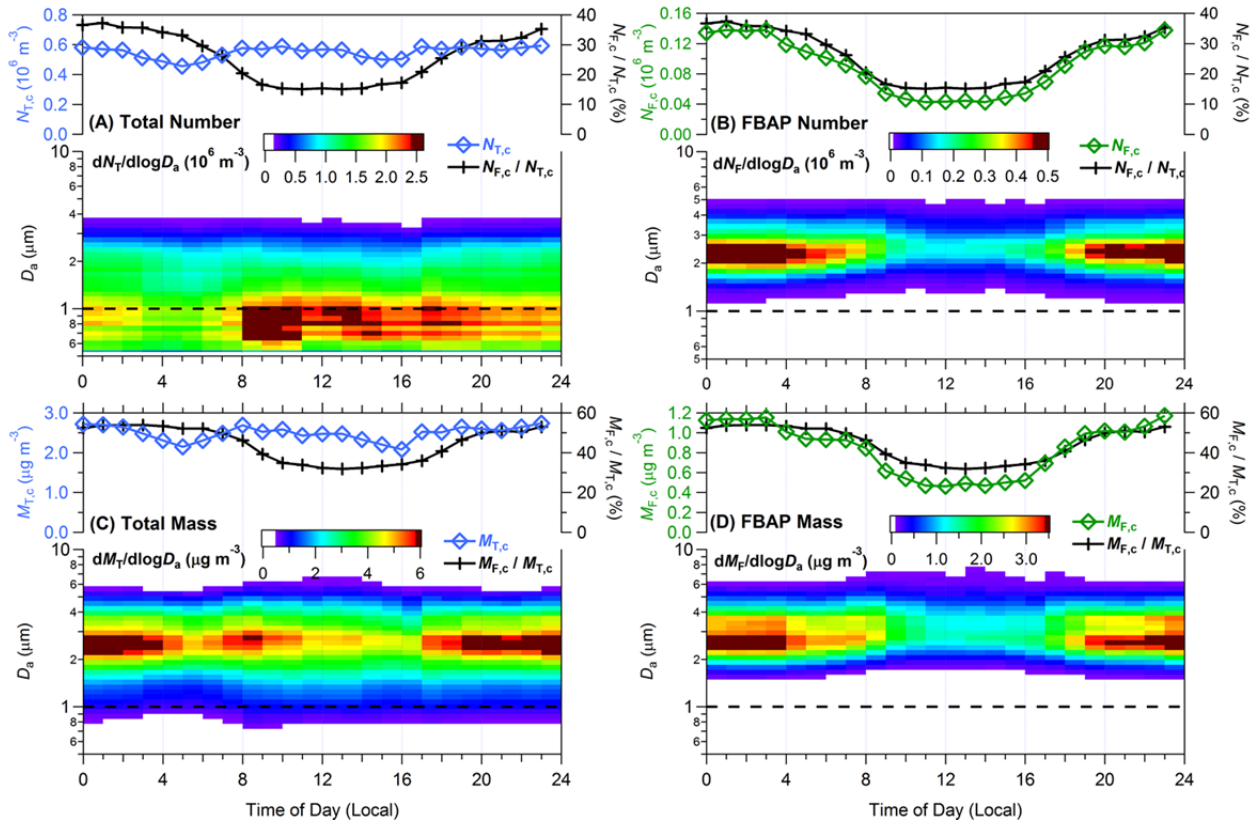

58

59 Figure S2.

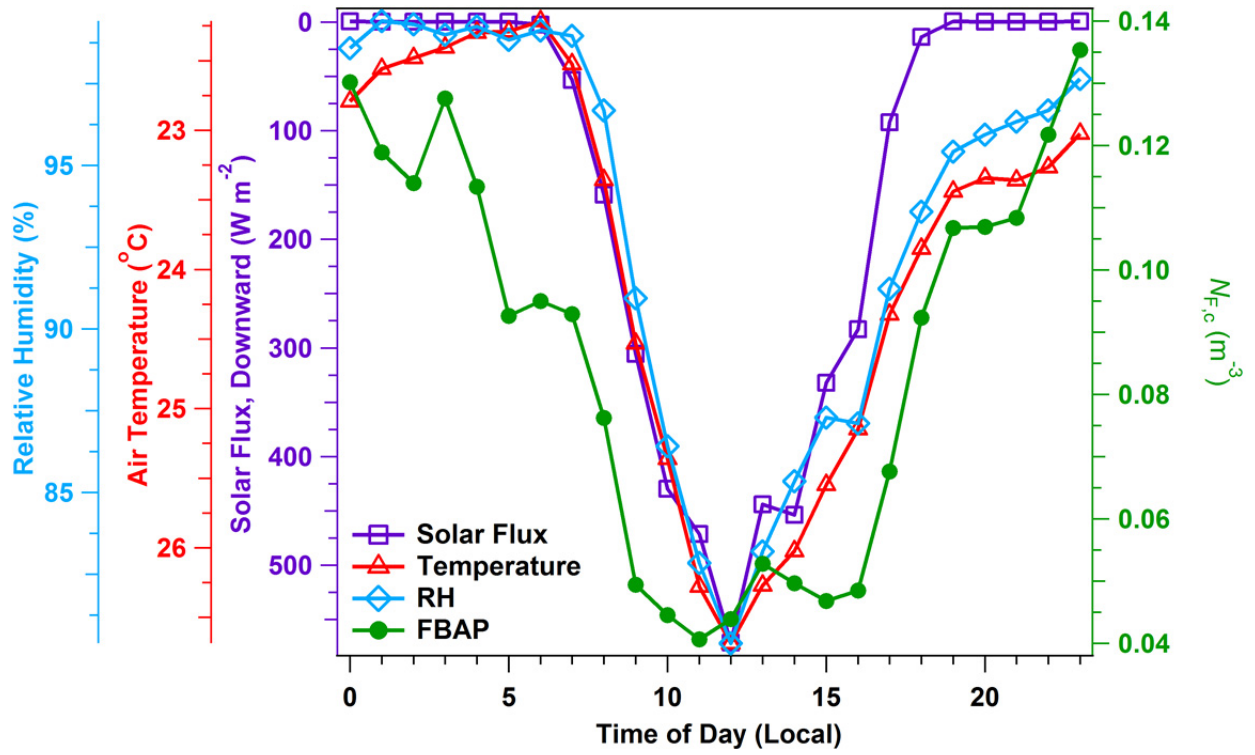

60

61 Figure S3.
